# Supplementary material
Source: publisher figshare collection journal article supplement (https://tandf.figshare.com/ndownloader/files/12754154)
Supplement: Supplementary file 1 [file 12754154]

**Supplementary Table S1**: Description of study locations (sampling sites and validation sites).

|  | Site type | Sampling Location ID | Number of sampling sites (polygons) within each sampling location | Average Area and Standard Deviation of the polygons in each sampling location (m2) |
| --- | --- | --- | --- | --- |
| Study Location | Sampling | Bar2 | 5 | 2743.02 +/- 668.48 |
| Esc | 3 | 1524.43 +/- 678.70 |
| Evo2 | 5 | 2562.85 +/- 803.97 |
| Fro | 4 | 2110.26 +/- 336.79 |
| Pov | 4 | 2874.31 +/- 621.19 |
| Red | 4 | 1795.97 +/- 416.84 |
| Ros | 6 | 1250.37 +/- 260.00 |
| San | 4 | 1889.51 +/- 642.58 |
| Validation | 10 locations | n.a. | 2826 |
